# Supplementary material
Source: Springer Nature journal article supplement (https://mijn.bsl.nl/resource/supplementary/13047_2013_603_MOESM2_ESM.pdf/7112994)

**Legend**

-  Chair (Podiatrist)
-  Chair (Patient)
-  Standard cabinet
-  UV cabinet
-  Air sampling unit

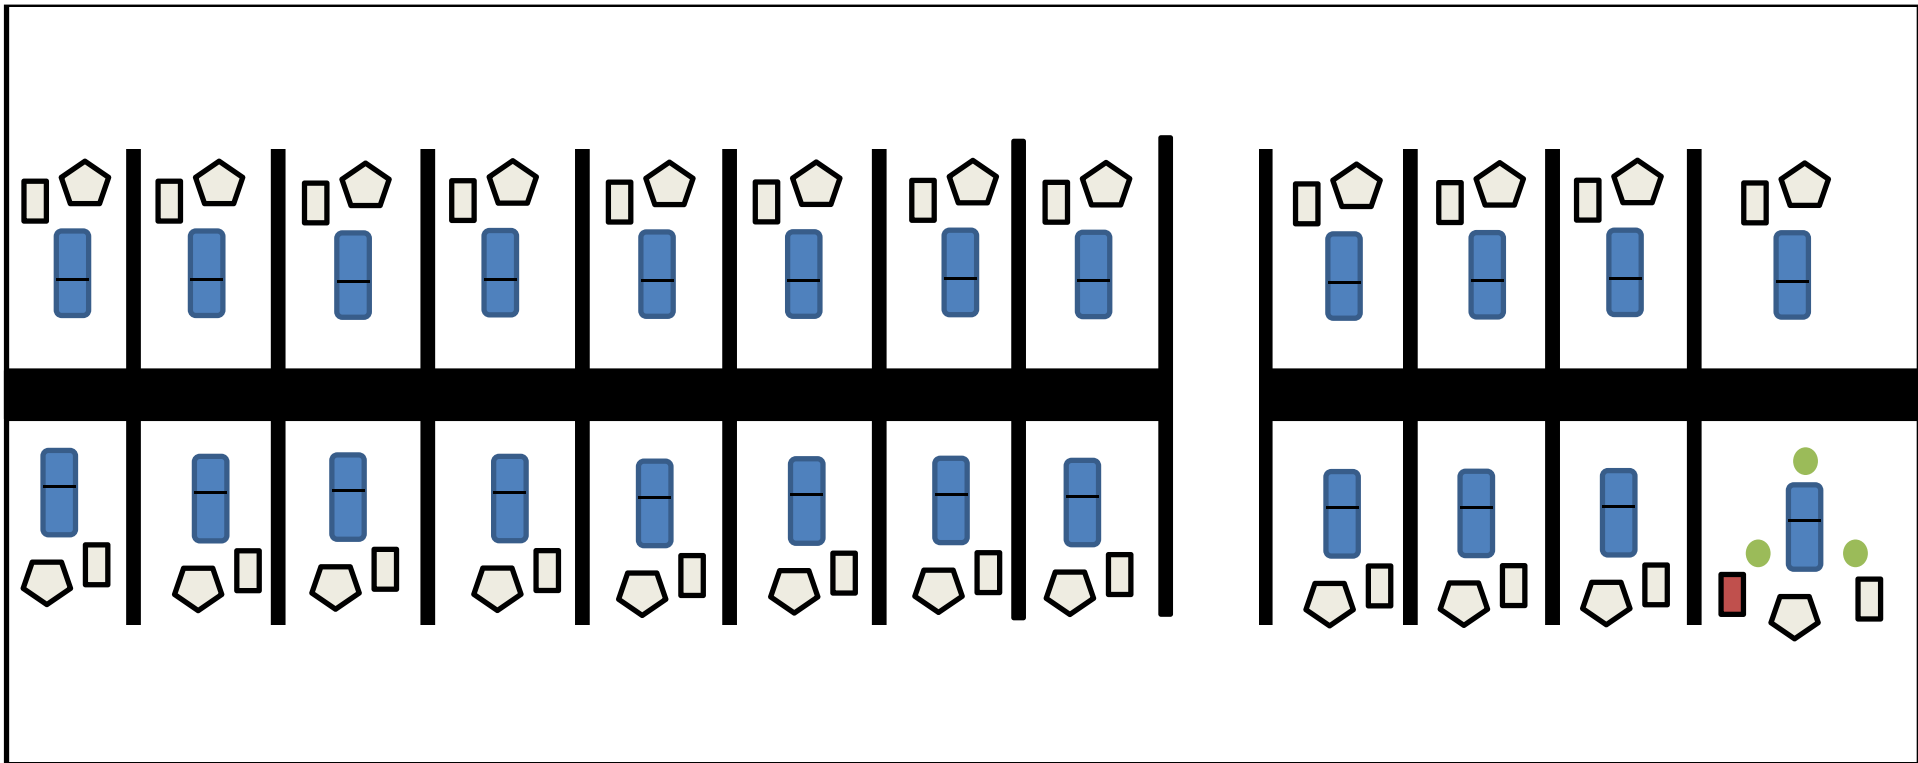

Supplement: MOESM2 [file 7112994]
